# Supplementary material for: Interlocus gene conversion explains at least 2.7 % of single nucleotide variants in human segmental duplications
Source: PubMed Central journal article supplement (PMC4467073; doi:10.1186/s12864-015-1681-3), 2015-06-16

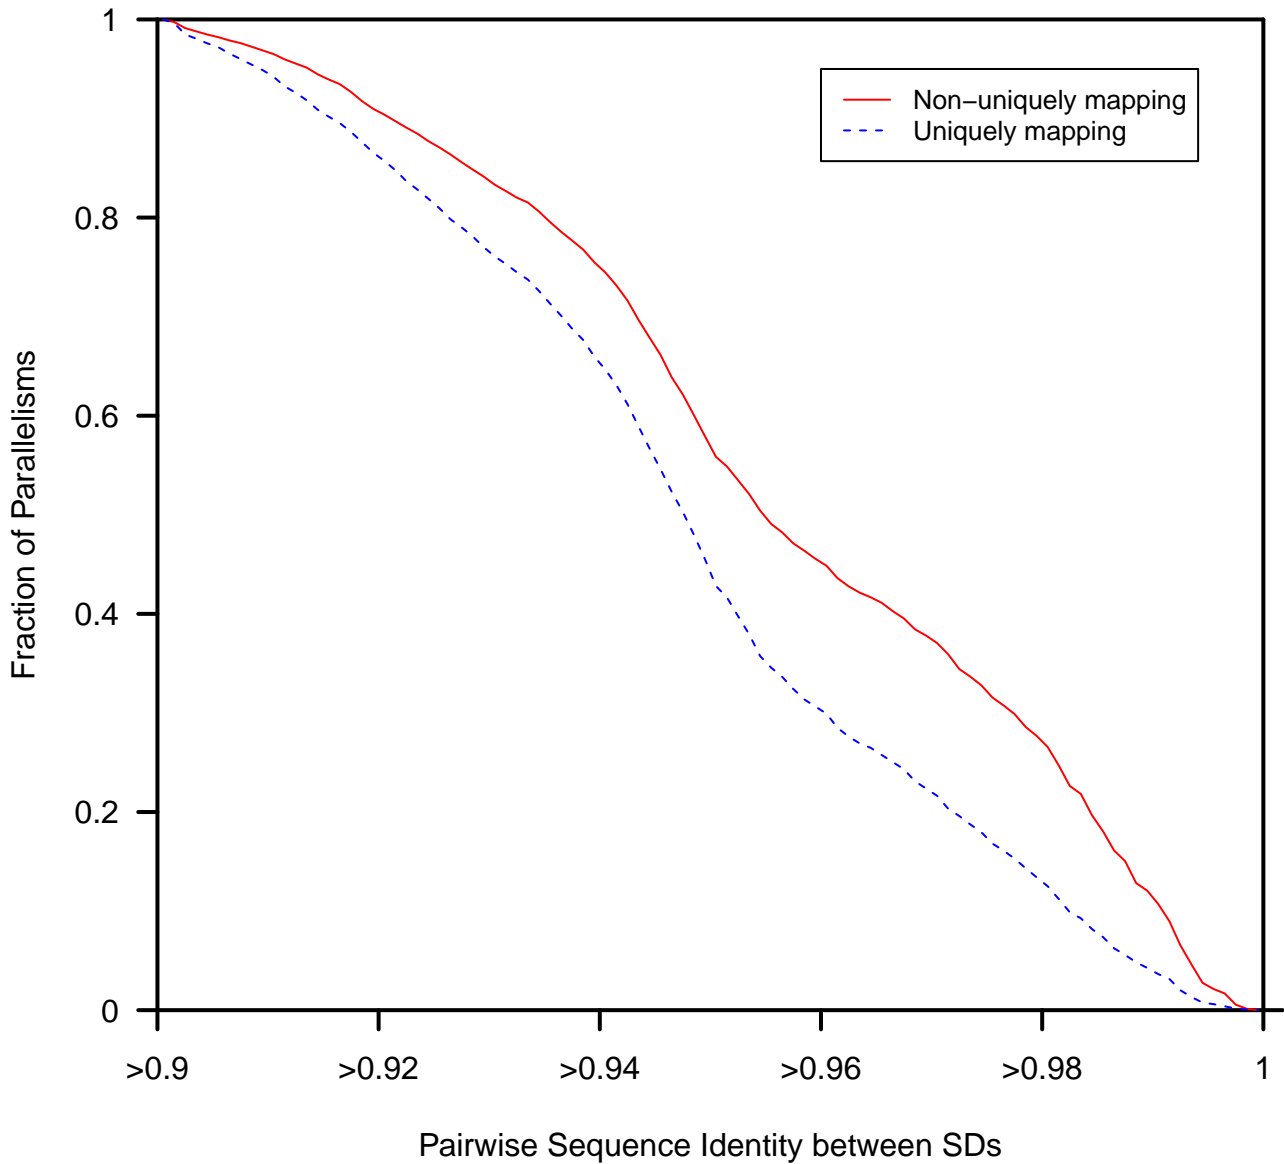

Supplement: 12864_2015_1681_MOESM2_ESM.pdf [file 12864_2015_1681_MOESM2_ESM.pdf]
